# Supplementary material
Source: HighWire-hosted journal article supplement (https://bmjopen.bmj.com/content/10/8/e036183)
Supplement: inline-supplementary-material-2 [file inline-supplementary-material-2.pdf]

Supplementary file: Definitions of the TDF domains taken from Cane

et al.(11)

| <b>Domain</b>                                       | <b>Definition</b>                                                                                                                                                                        |
|-----------------------------------------------------|------------------------------------------------------------------------------------------------------------------------------------------------------------------------------------------|
| <b>1. Knowledge</b>                                 | An awareness of the existence of something                                                                                                                                               |
| <b>2. Skills</b>                                    | An ability or proficiency acquired through practice                                                                                                                                      |
| <b>3. Social/Professional Role and Identity</b>     | A coherent set of behaviours and displayed personal qualities of an individual in a social or work setting                                                                               |
| <b>4. Beliefs about Capabilities</b>                | Acceptance of the truth, reality, or validity about an ability, talent, or facility that a person can put to constructive use                                                            |
| <b>5. Optimism</b>                                  | The confidence that things will happen for the best or that desired goals will be attained                                                                                               |
| <b>6. Beliefs about Consequences</b>                | Acceptance of the truth, reality, or validity about outcomes of a behaviour in a given situation                                                                                         |
| <b>7. Reinforcement</b>                             | Increasing the probability of a response by arranging a dependent relationship, or contingency, between the response and a given stimulus                                                |
| <b>8. Intentions</b>                                | A conscious decision to perform a behaviour or a resolve to act in a certain way                                                                                                         |
| <b>9. Goals</b>                                     | Mental representations of outcomes or end states that an individual wants to achieve                                                                                                     |
| <b>10. Memory, Attention and Decision Processes</b> | The ability to retain information, focus selectively on aspects of the environment and choose between two or more alternatives                                                           |
| <b>11. Environmental Context and Resources</b>      | Any circumstance of a person's situation or environment that discourages or encourages the development of skills and abilities, independence, social competence, and adaptive behaviour) |
| <b>12. Social influences</b>                        | Those interpersonal processes that can cause individuals to change their thoughts, feelings, or behaviours                                                                               |

---

**13. Emotion** A complex reaction pattern, involving experiential, behavioural, and physiological elements, by which the individual attempts to deal with a personally significant matter or event

---

**14. Behavioural Regulation** Anything aimed at managing or changing objectively observed or measured actions

---

All definitions are based on definitions from the American Psychological Associations' Dictionary of Psychology (23)
