# Supplementary material
Source: HighWire-hosted journal article supplement (https://bmjopen.bmj.com/content/10/8/e036183)
Supplement: inline-supplementary-material-3 [file inline-supplementary-material-3.pdf]

**Supplementary File 3: Mapping of the COM-B system to the TDF Domains**

| <b>Capability</b>                                                                     | <b>Opportunity</b>                                       | <b>Motivation</b>                                                                                                                                               |
|---------------------------------------------------------------------------------------|----------------------------------------------------------|-----------------------------------------------------------------------------------------------------------------------------------------------------------------|
| Knowledge<br>Skills<br>Behaviour regulation<br>Memory, Attention & Decision Processes | Social Influences<br>Environmental Context and Resources | Social Professional Role & Identity<br>Beliefs about capabilities<br>Optimism<br>Beliefs about consequences<br>Intentions and Goals<br>Reinforcement<br>Emotion |

Taken from Cane et al.(11)
